# Supplementary material for: Low-protein diet applied as part of combination therapy or stand-alone normalizes lifespan and tumor proliferation in a model of intestinal cancer
Source: publisher site journal article supplement (doi:10.18632/aging.203692), 2021-11-12
Supplement: Supplementary file [file aging-v13i21-203692-supplementary-material-SD1.pdf]

## SUPPLEMENTARY FIGURES

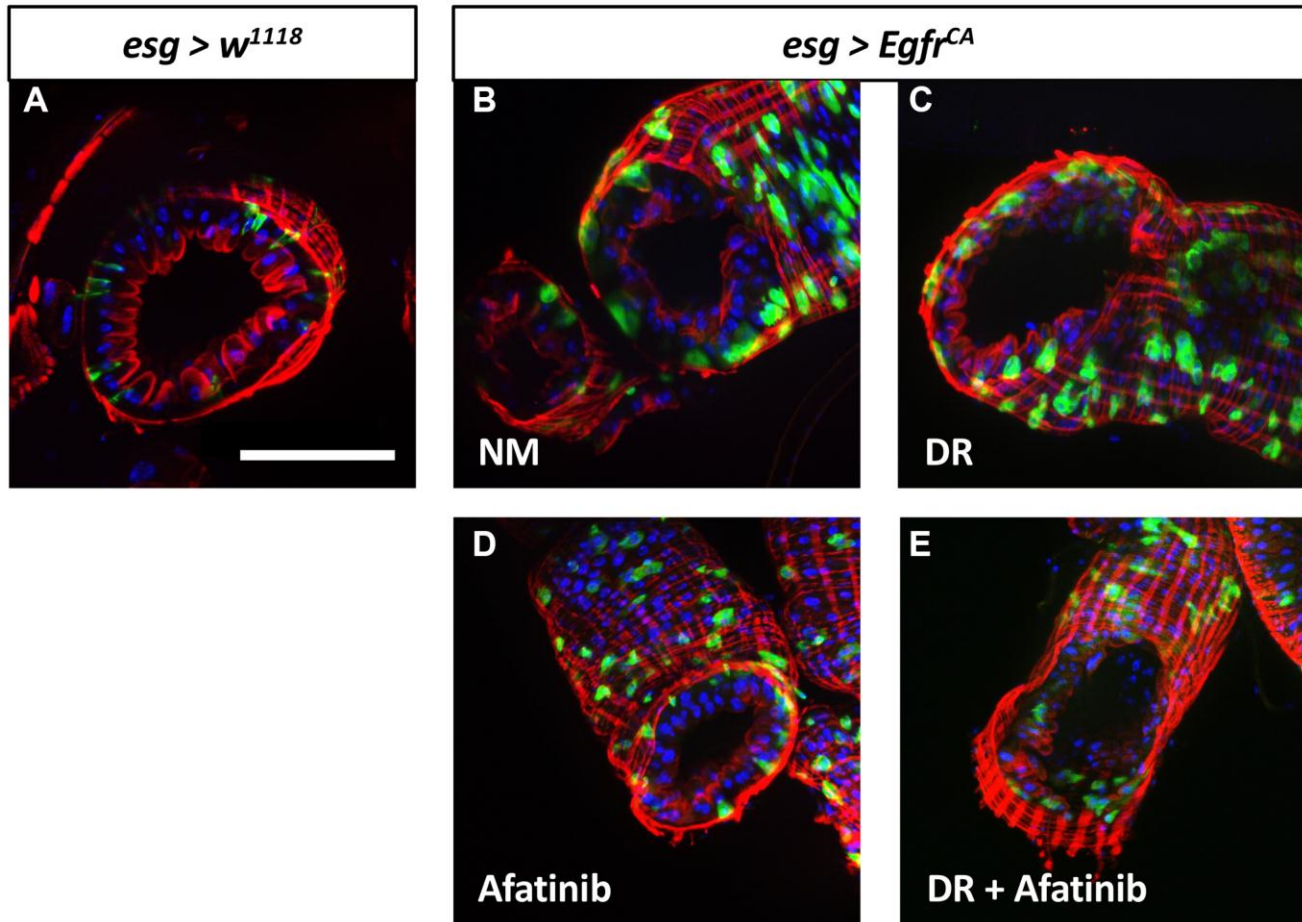

**Supplementary Figure 1.** Transverse sections through *Drosophila* abdomen of controls (*esg > w<sup>1118</sup>*) and *Egfr<sup>CA</sup>* (*esg > Egfr<sup>CA</sup>*) after 5 days of induction at 29°C. (A) Control animals on NM. (B) *Egfr<sup>CA</sup>* animals on NM, (C) DR, (D) 100 μM Afatinib or (E) DR + 100 μM afatinib. Abbreviations: NM = normal medium; DR = dietary restriction; green = GFP: ISC; blue = DAPI: DNA; red = Phalloidin, actin. Scale bar = 100 μm.

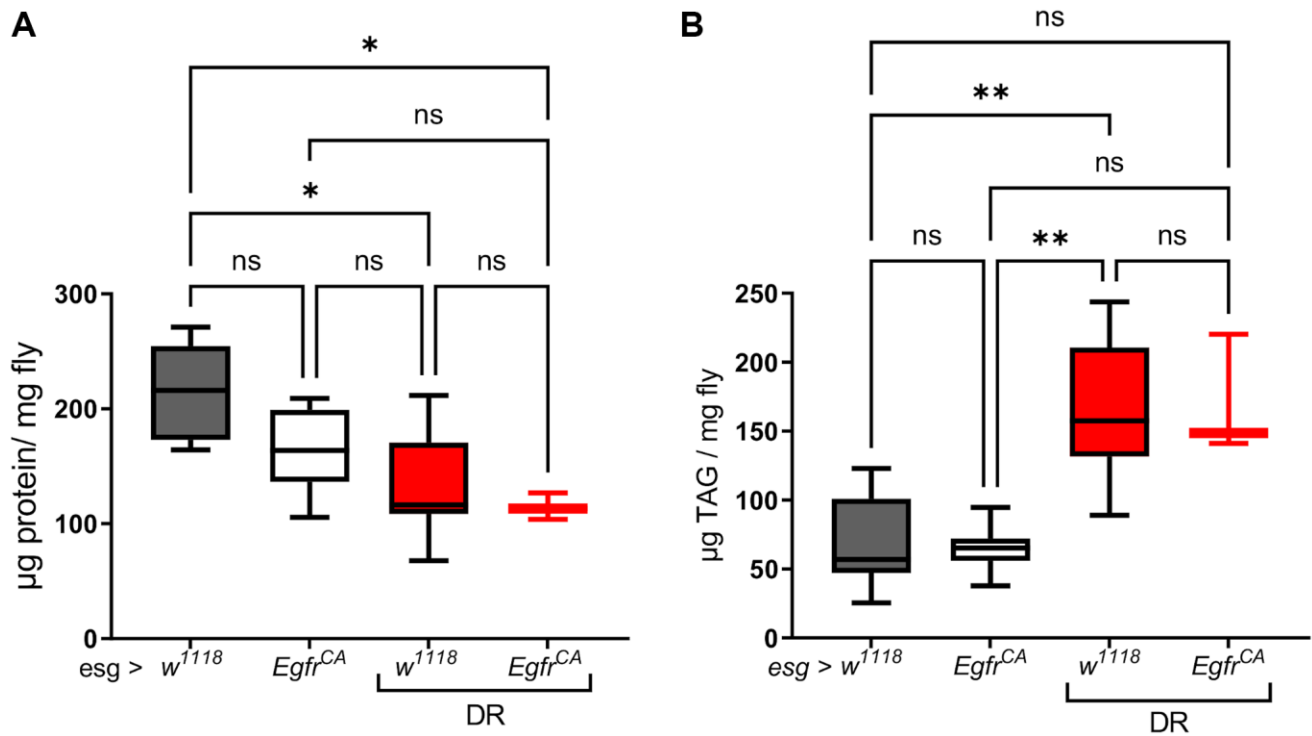

**Supplementary Figure 2. (A) Protein content and (B) triacylglyceride content of controls (*esg > w<sup>1118</sup>*) and *esg > Egfr<sup>CA</sup>* after 15 days of induction.** Abbreviation: DR = dietary restriction. Significances were calculated with ANOVA and Tukey test and are marked with lines. ns = not significant, \* =  $p < 0.05$ , \*\* =  $p < 0.01$ , \*\*\* =  $p < 0.001$ , \*\*\*\* =  $p < 0.0001$ .  $n = 3-11$ .

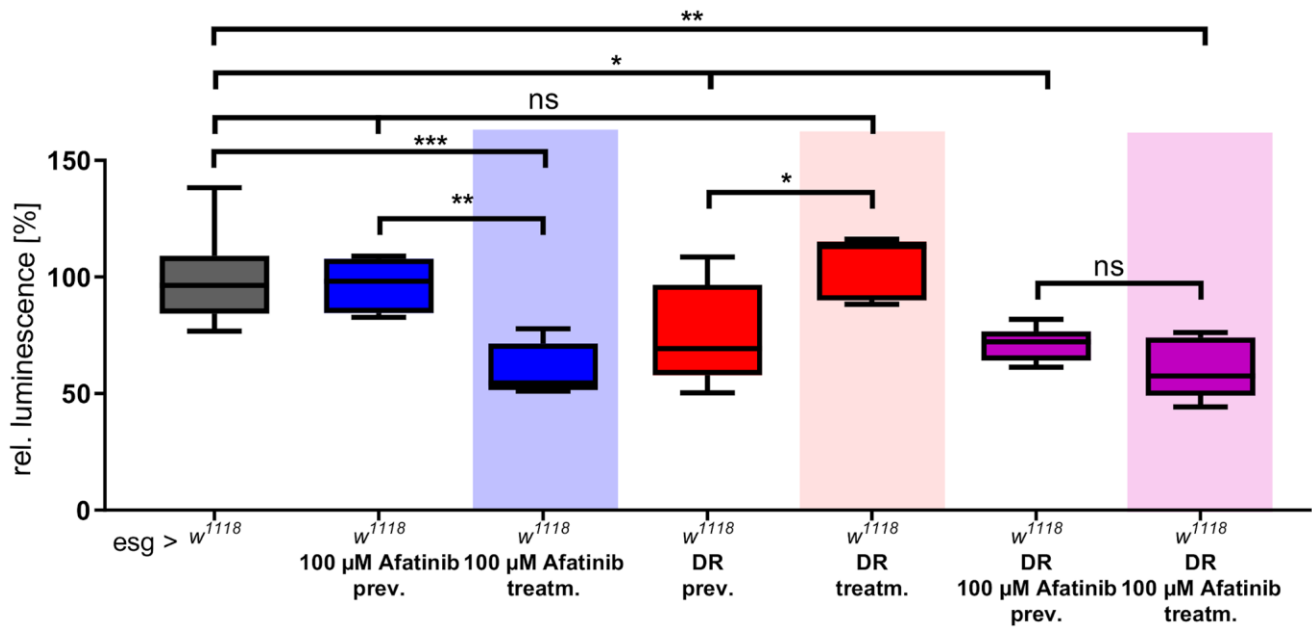

**Supplementary Figure 3. Relative luminescence of *esg > w<sup>1118</sup>* animals after 15 days of induction at 29°C exposed to dietary restriction and afatinib.** Abbreviations: DR = dietary restriction, prev. = prevention. Significances were calculated with one-way ANOVA and Tukey test and are marked with lines. ns = not significant, \* =  $p < 0.05$ , \*\* =  $p < 0.01$ , \*\*\* =  $p < 0.001$ , \*\*\*\* =  $p < 0.0001$ .  $n = 5-8$ .
